# Supplementary material
Source: publisher figshare collection journal article supplement (https://sage.figshare.com/ndownloader/files/17430353)
Supplement: Supplementary file 1 [file 17430353]

The following is a recent newspaper article regarding Samsung Galaxy's recall:

# The New York Times

## Samsung to Recall 2.5 Million Galaxy Note 7s Over Battery Fires

By Paul Mozur and Su-Hyun Lee

HONG KONG — In a potentially damaging episode, Korean electronics maker Samsung announced on Friday that it would recall its Galaxy Note 7 model after discovering a flaw in the battery cell that could result in fires.

By now, Samsung has received at least 92 reports of Note 7 batteries overheating in the United States, with 26 reports of burns and 55 reports of property damage, according to information posted by the United States Consumer Product Safety Commission.

The company will replace 2.5 million phones sent to stores and consumers. The recall covers 10 countries where the phones have been sold. Samsung, which is at the heart of the South Korean economy's success story may put in a precarious position because of this recall.

**Appendix 1.** Product-harm crisis scenario. **[AQ: 10]**

**Now, you will read a newspaper article regarding LG Electronics new mobile phone product.**

---

LG Electronics(Korean: LG전자) is a South Korean multinational electronics company.

For mobile business, LG aimed to provide consumers with better mobile experiences. Also manufactures a wide range of smartphones.

LG G6 has been officially announced during MobileWorld Congress 2017 on 26th of February 2017. Several mobile carriers proclaimed that the new G6 will be available on April 7 into its online shop and local shops.

**Now, you will read a newspaper article regarding LG Electronics new tablet product.**

---

LG Electronics(Korean: LG전자) is a South Korean multinational electronics company.

For tablet business, LG Electronics aimed to provide consumers with better tablet experiences. Also manufactures a wide range of tablets. For LG G series pad products, The LG G Pad X 8.0 has been officially announced in April 2017.

**Appendix 2.** LG new smartphone/tablet scenario.

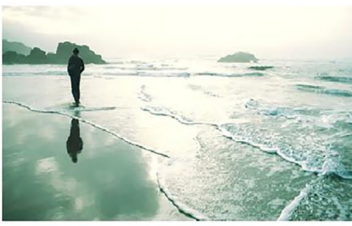

*Remember the day by yourself at the beach.*

*The warm light of sun shining down on you.*

*The sound of the surf crashing on the shore.*

*Nothing beats a quiet moment by yourself.*

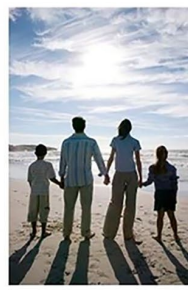

*Remember the day with your family and friends at the beach.*

*The warm light of sun shining down on all of you.*

*The sound of the waves crashing on the shore.*

*Nothing beats a moment with those close to your heart.*

**Appendix 3.** Self-construals manipulations (left: independent self-construal priming; right: interdependent self-construal priming).
